# Supplementary material
Source: publisher site journal article supplement (https://www.spandidos-publications.com/5495/downloadSupplementary)
Supplement: Supplementary file 1 [file downloadSupplementary]

Table SI. Demographics of the study population and biological samples in GSE20257 (17).

| Parameter                                  | Healthy non-smokers | Healthy smokers | Smokers with COPD <sup>a</sup> |
|--------------------------------------------|---------------------|-----------------|--------------------------------|
| Total patients, n                          | 53                  | 59              | 23                             |
| Sex, n                                     |                     |                 |                                |
| Male                                       | 38                  | 39              | 18                             |
| Female                                     | 15                  | 20              | 5                              |
| Age, years                                 | 41.0±11.3           | 42.9±7.2        | 51.7±8.4                       |
| Ethnicity, n                               |                     |                 |                                |
| Black                                      | 24                  | 35              | 38                             |
| White                                      | 20                  | 14              | 57                             |
| Other                                      | 9                   | 10              | 3                              |
| Smoking history, pack-year                 | -                   | 27.6±16.9       | 40.8±27.6                      |
| Urine nicotine, ng/ml                      | -                   | 1216±1604       | 1069±1126                      |
| Urine cotinine, ng/ml                      | -                   | 1273±1022       | 1337±592                       |
| Blood carboxyhemoglobin, %                 | 0.4±0.7             | 1.8±1.8         | 2.9±1.9                        |
| Pulmonary function parameters <sup>b</sup> |                     |                 |                                |
| FVC                                        | 107±13              | 109±13          | 97±20                          |
| FEV1                                       | 105±14              | 107±14          | 74±20                          |
| FEV1/FVC                                   | 81±6                | 80±5            | 61±8                           |
| TLC                                        | 101±13              | 101±12          | 103±21                         |
| DLCO                                       | 99±15               | 94±11           | 75±18                          |
| GOLD stage (I/II/III) <sup>a</sup>         | -                   | -               | 9/12/2                         |
| Medication use, n                          |                     |                 |                                |
| β-agonist                                  | -                   | -               | 7                              |
| Anticholinergic                            | -                   | -               | 2                              |
| Inhaled corticosteroid                     | -                   | -               | 3                              |
| Epithelial cells <sup>c</sup>              |                     |                 |                                |

|                                    |          |           |           |
|------------------------------------|----------|-----------|-----------|
| Number recovered, x10 <sup>6</sup> | 6.6±2.9  | 7.2±3.0   | 6.7±3.1   |
| Epithelial cells <sup>d</sup> , %  | 99.1±1.4 | 99.0±1.5  | 98.7±1.6  |
| Inflammatory cells, %              | 0.9±1.4  | 0.9±1.5   | 1.3±1.6   |
| Differential cell count            |          |           |           |
| Ciliated, %                        | 73.0±8.3 | 65.8±12.4 | 62.9±10.9 |
| Secretory, %                       | 6.7±3.5  | 9.0±4.5   | 12.1±5.6  |
| Basal, %                           | 12.0±5.9 | 12.6±6.6  | 12.1±6.2  |
| Undifferentiated, %                | 7.3±3.2  | 11.9±6.6  | 11.5±3.6  |

<sup>a</sup>Smokers with established COPD as defined by the GOLD criteria (39). The COPD smoker group included: GOLD I (n=9), GOLD II (n=12) and GOLD III (n=2). <sup>b</sup>The pulmonary function testing parameters are given as the % of predicted value with the exception of FEV1/FVC, which is reported as the % observed. The COPD, FVC, FEV1 and FEV1/FVC are post-bronchodilator values. <sup>c</sup>Small airway epithelium. <sup>d</sup>As a % of small airway epithelium recovered. Data are presented as mean ± SD unless stated otherwise. COPD, chronic obstructive pulmonary disease; GOLD, The Global Initiative for Chronic Obstructive Lung Disease; FVC, forced vital capacity; FEV1, forced expiratory volume in 1 sec; TLC, total lung capacity; DLCO, diffusing capacity.
